# Supplementary material
Source: publisher site journal article supplement (https://www.degruyterbrill.com/publication/journal_key/CERCLES/downloadAsset/CERCLES_Submission%20Guidelines.docx)
Supplement: Supplementary file 1 [file CERCLES_Submission%20Guidelines.docx]

***Language Learning in Higher Education***

**Guidelines for contributors**

**___________________________________________________________________________**

*Language Learning in Higher Education* is concerned with all aspects of language education at tertiary level, including: *language education, applied linguistics, humanistic approaches to language learning, multilingualism, intercultural communication, inter-comprehension, academic language competences, creativity in language education, autonomous learning, methodology and didactic approaches, language assessment, CLIL, EMI, language education for sustainable development, quality assurance, university language policies, the exploitation of digital technologies and artificial intelligence.*

The journal publishes Research Articles (5000–7000 words) and Activity Reports (2000–3000 words) in the three official languages of CercleS (English, French and German).

Articles that report on empirical or experimental research should carry clear and explicit pedagogical implications, while those concerned with a practical dimension of language learning/teaching should include discussion of research-based principles. Articles on other areas of interest should include critical engagement with current discussion in the relevant literature. Submissions that the Editors-in-Chief judge worthy of serious consideration are peer-reviewed.

Activity reports should focus on an innovative activity carried out in a Language Centre and likely to be of interest to colleagues in other Language Centres. Submissions are reviewed by the editors-in-chief and the assistant editors.

Typescripts may be submitted after Call for Papers or at any time under <https://mc.manuscriptcentral.com/llhe> where you will be guided through the whole peer-reviewing and publishing process..

Articles (5000–7000 words including references but excluding tables, figures and appendices) should be presented as follows:

1. Name of author(s)
2. Title of article
3. Abstract (200–250 words)
4. Key words (between 5 and 7)
5. Name of author(s) followed by institutional affiliation(s) and e-mail address(es). When there are two or more authors, please indicate which of them should receive correspondence
6. Text of article
7. References
8. Appendices
9. Tables and/or figures in the order in which they appear in the article

Activity reports (2000–3000 words including references but excluding tables, figures and appendices)

should presented as follows:

1. Name of author(s)
2. Title of activity report
3. Abstract (150–200 words)
4. Key words (between 5 and 7)
5. Name of author(s) followed by institutional affiliation(s) and e-mail address(es). When there

are two or more authors, please indicate which of them should receive correspondence

1. Text of activity report organized as follows:
   1. Description of context
   2. Account of activity
   3. Summary of results/experience
   4. Future prospects
2. References (if any)
3. Appendices (if any)
4. Tables and/or figures (if any)

Articles and activity reports should be formatted as follows:

Margins: 2.5 cm

Font: Times New Roman 12pt

Paragraph spacing: 1.5 lines

Numbering of sections and sub-sections: please follow the publisher’s style sheet (appended to these guidelines)

Indent the first line of each paragraph by pressing the tab key once No space after paragraphs

As indicated above, tables and figures should be inserted in sequence at the end of your text file. Indicate roughly where each table/figure should occur by inserting in your text: *[Please in-sert Table/Figure X here]*

Footnotes should be used sparingly and inserted using the INSERT FOOTNOTE function in Word

Figures, screenshots, etc. should be submitted as high-resolution images

References, both in the running text and in the list at the end of the article, should be presented strictly according to the publisher’s style sheet https://www.degruyter.com/publication/journal_key/CERCLES/downloadAsset/CERCLES_Mouton%20Journal%20Stylesheet.pdf

Submissions that fail to observe these conventions will not be considered for publication.

The authors are kindly invited to use the expression “modern languages or modern foreign languages” in their texts. Moreover, if the authors are not fully confident in the language in which they write their article/activity report they are strongly advised to have their text checked by an expert in academic writing before they submit it.

*Carmen Argondizzo* and *Anne Chateau*

Editors-in-Chief
